# Supplementary material for: Bis spin-labelled cyclodextrins
Source: Royal Society of Chemistry journal article supplement (doi:10.1039/b708751a), 2007-01-01

**Supporting information for:**

# Bis spin labelled cyclodextrins

*Gabriela Ionita, Victor Chechik*

**Table of contents.**

|                                                                                   |          |
|-----------------------------------------------------------------------------------|----------|
| General details                                                                   | page S2  |
| Synthesis of <b>A2P2</b>                                                          | page S2  |
| Synthesis of dihydroxy permethylated- $\beta$ -cyclodextrin isomers               | page S2  |
| ESI-HR-MS spectrum for <b>A2P2</b>                                                | page S4  |
| $^1\text{H}$ NMR spectrum of <b>A2P2</b>                                          | page S5  |
| ESI-MS spectrum for dihydroxy permethylated $\beta$ -cyclodextrin                 | page S6  |
| $^{13}\text{C}$ NMR for dihydroxy permethylated $\beta$ -cyclodextrin (AB isomer) | page S7  |
| $^{13}\text{C}$ NMR for dihydroxy permethylated $\beta$ -cyclodextrin (AD isomer) | page S8  |
| ESI-MS for the <b>AB</b> diradical                                                | page S9  |
| ESI-MS for the <b>AD</b> diradical                                                | page S10 |

### General details.

EPR spectra were recorded on Bruker ESP-300E spectrometer at microwave frequency 9.49 GHz with a 100 kHz modulation frequency, a microwave power 1 mW, modulation amplitude 0.1 mT, scan time 335 s, scan width 100 G for spectra at room temperature and 200 G for spectra at 120 K.

Synthesis of A2P2: Adamantane-1-carbonyl chloride (322 mg, 2.4 mmol) was added to a solution of diethylene glycol (106 mg, 1 mmol) in dichloromethane (20 ml) in the presence of triethylamine (one drop). After stirring for one day at room temperature, the reaction mixture was washed successively with 0.1 M HCl and saturated NaHCO<sub>3</sub> aqueous solutions. The organic layer was dried (Na<sub>2</sub>SO<sub>4</sub>). The solution was concentrated and purified by column chromatography using 10% ethyl acetate/dichloromethane as an eluent. R<sub>f</sub> 0.43. Yield 60 %.

ESI-HR-MS data for A2P2: calc. for [C<sub>26</sub>H<sub>38</sub>O<sub>5</sub> + H]<sup>+</sup> 431.2797, found for [M+H]<sup>+</sup> 431.2784. [C<sub>26</sub>H<sub>38</sub>O<sub>5</sub> + NH<sub>4</sub>]<sup>+</sup> 448.3063, found for [M+H]<sup>+</sup> 448.3058.

Synthesis of dihydroxy permethylated-β-cyclodextrin isomers. The procedure reported by Z. Chen et al, *J. Org. Chem.* **1997**, *62*, 8529, was followed in order to obtain 6<sup>A</sup>, 6<sup>D</sup>- and 6<sup>A</sup>, 6<sup>B</sup>- dihydroxy permethylated β-cyclodextrin. β-CD (2.27 g, 2 mmol) and imidazole (0.47, 14 mmol) were mixed in dry DMF (100 ml) under stirring. Then tert-butyldimethylsilyl chloride (1.08 g, 14 mmol) was added in one portion. This mixture was stirred for 1.5 h at rt and then cooled to 0 °C and NaH (3.2 g, 260 mmol) was added. The mixture was stirred at 0 °C for 30 min and then at rt for 1 h. The mixture was again cooled to 0 °C and CH<sub>3</sub>I (17 ml, 253 mmol) was added dropwise. The mixture was kept at 0 °C for 1 h and then overnight at rt. The reaction was quenched by careful addition of ice-water mixture (10 ml) with stirring and extracted with CHCl<sub>3</sub> (100 mL × 3). The combined organic layers were washed successively with 6% aqueous solution of Na<sub>2</sub>S<sub>2</sub>O<sub>3</sub> (50 mL) and water (50 mL × 2) and then dried (MgSO<sub>4</sub>). After concentration, the

obtained solid residue was refluxed with ammonium fluoride in 200 mL of CH<sub>3</sub>OH overnight. The mixture was evaporated and the residue dissolved in CHCl<sub>3</sub> (100 mL) and then filtered and concentrated. The diols were separated twice by column chromatography on silica gel (200-400 mesh) using CHCl<sub>3</sub>/MeOH (50:1) mixture as an eluent. First separation gave a mixture of AB, AC and AD isomers, which were separated on a second column Yield: 6.6 % (AD), 8 % (AB). R<sub>f</sub>: 0.40 (AD, CHCl<sub>3</sub>/MeOH 10/1); 0.30 (AB, CHCl<sub>3</sub>/MeOH 10/1). ESI-MS data for AB/AC/AD mixture: calc. for [C<sub>61</sub>H<sub>108</sub>O<sub>35</sub> + Na]<sup>+</sup> 1423.6568, found for [M + H]<sup>+</sup> 1423.7.

## ESI-MS spectrum for A2P2

### Dept of Chemistry Univ. of YORK MS REPORT

**Analysis Info**  
Analysis Name D:\Data\TODAY\vc16051gi\_1-e,1\_01\_2047.d  
Method t800openloop.m  
Sample Name vc16051gi  
Comment G. Ionita A2P2

Acquisition Date 21/03/2007 14:07:02  
admin

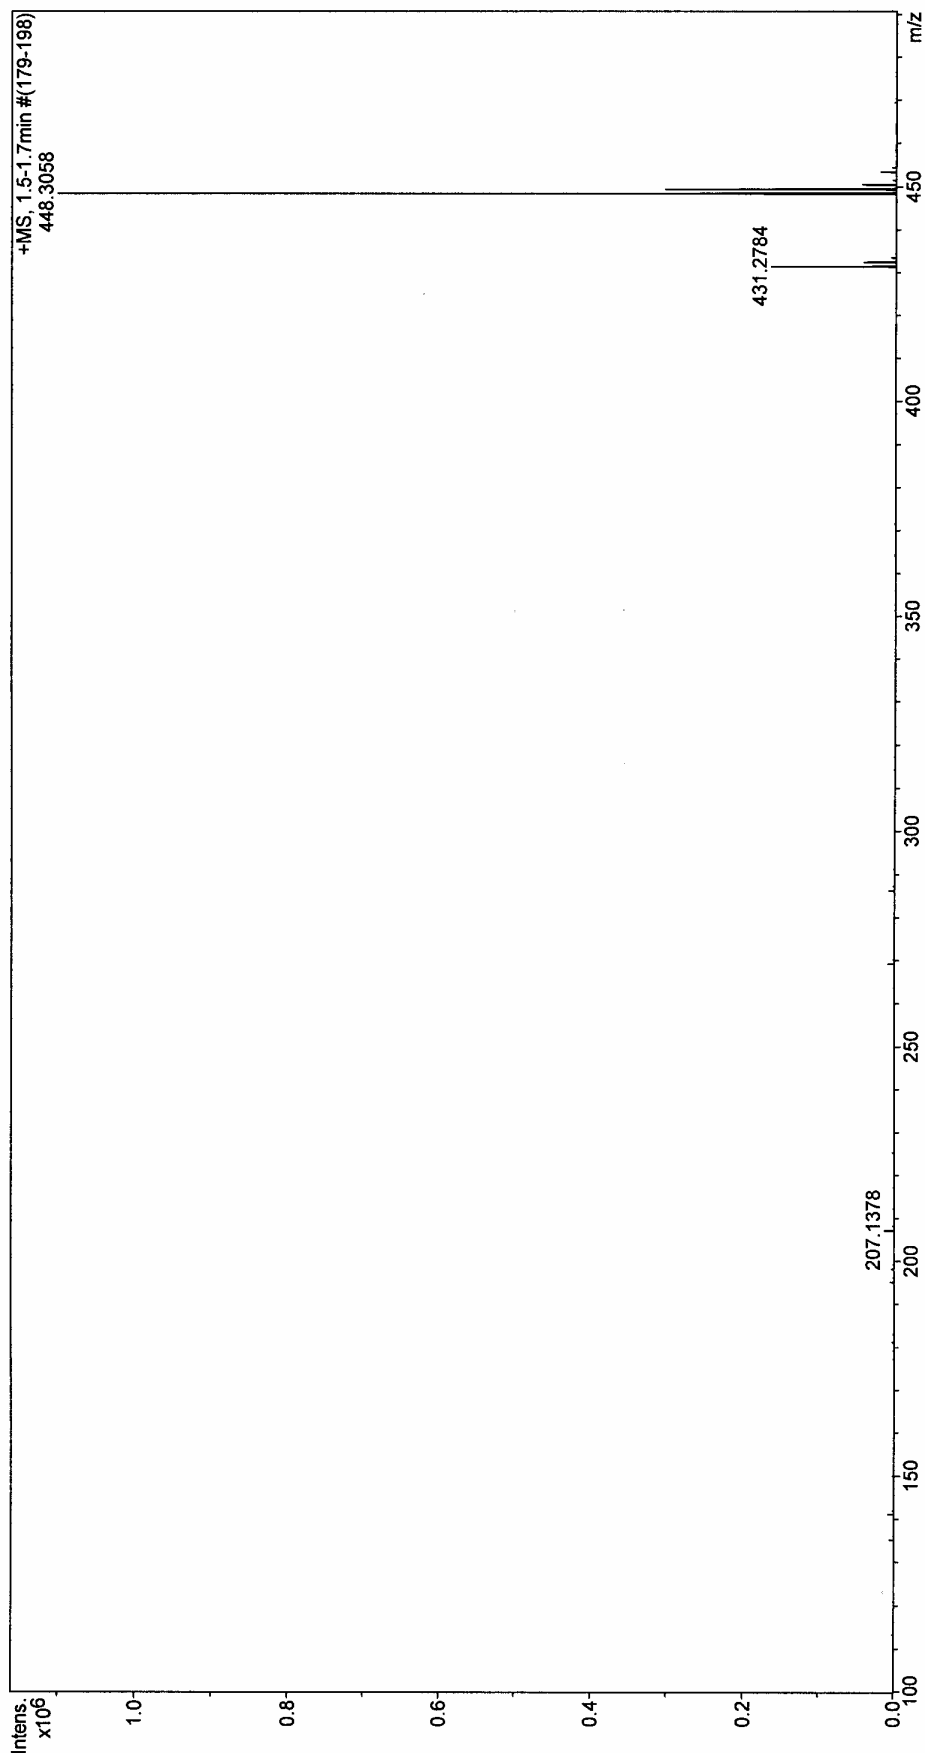

<sup>1</sup>H NMR spectrum of A2P2

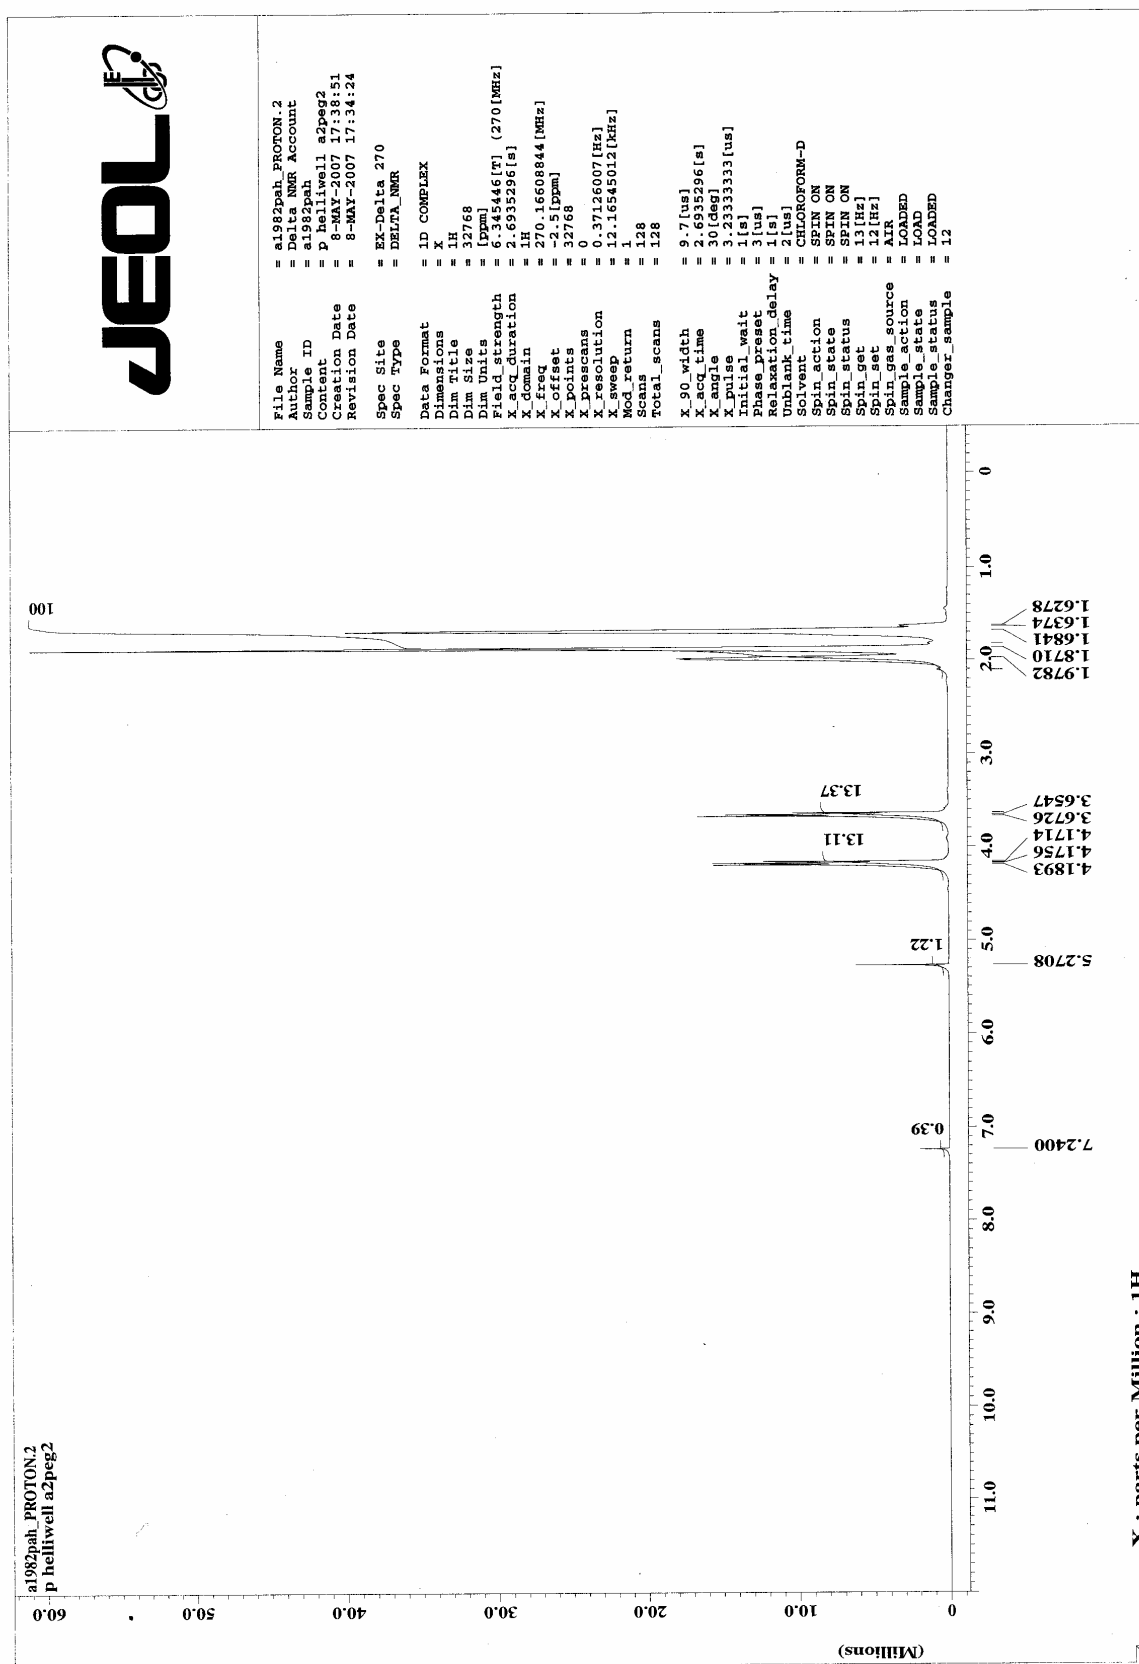

ESI-MS spectrum for dihydroxy permethylated  $\beta$ -cyclodextrin (mixture of AB, AC and AD isomers).

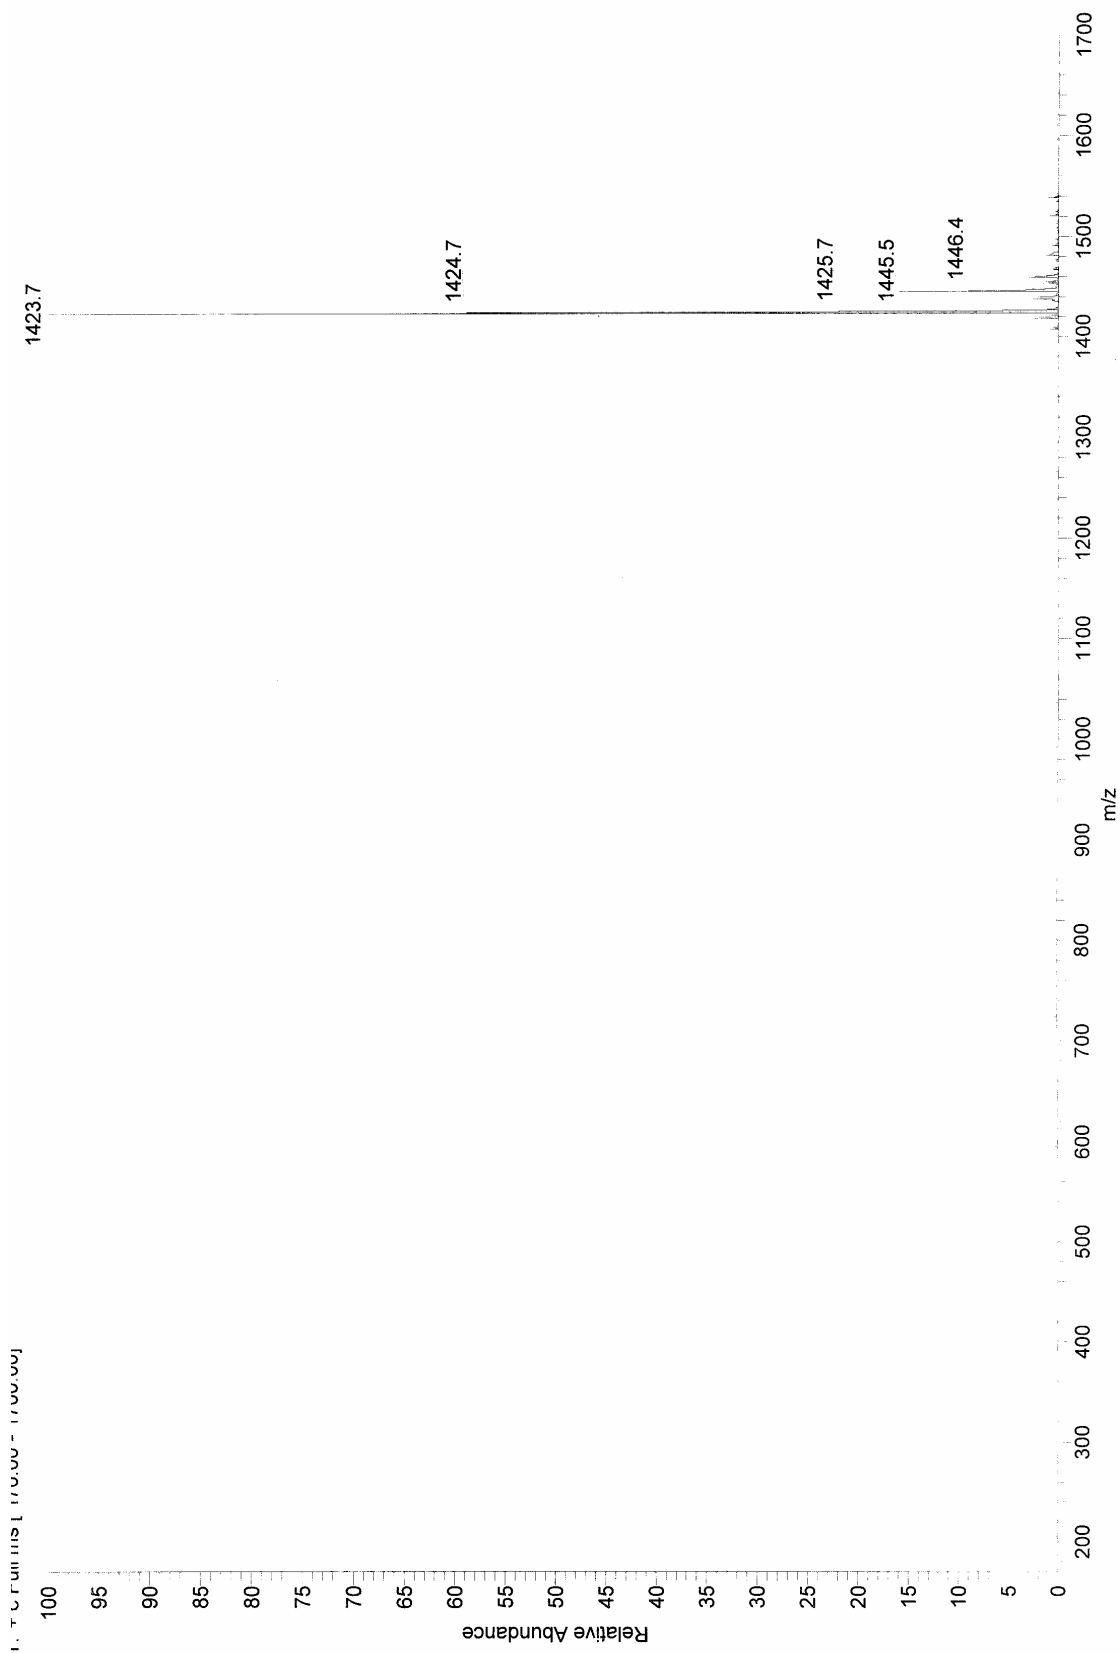

$^{13}\text{C}$  NMR for dihydroxy permethylated  $\beta$ -cyclodextrin (AB isomer)

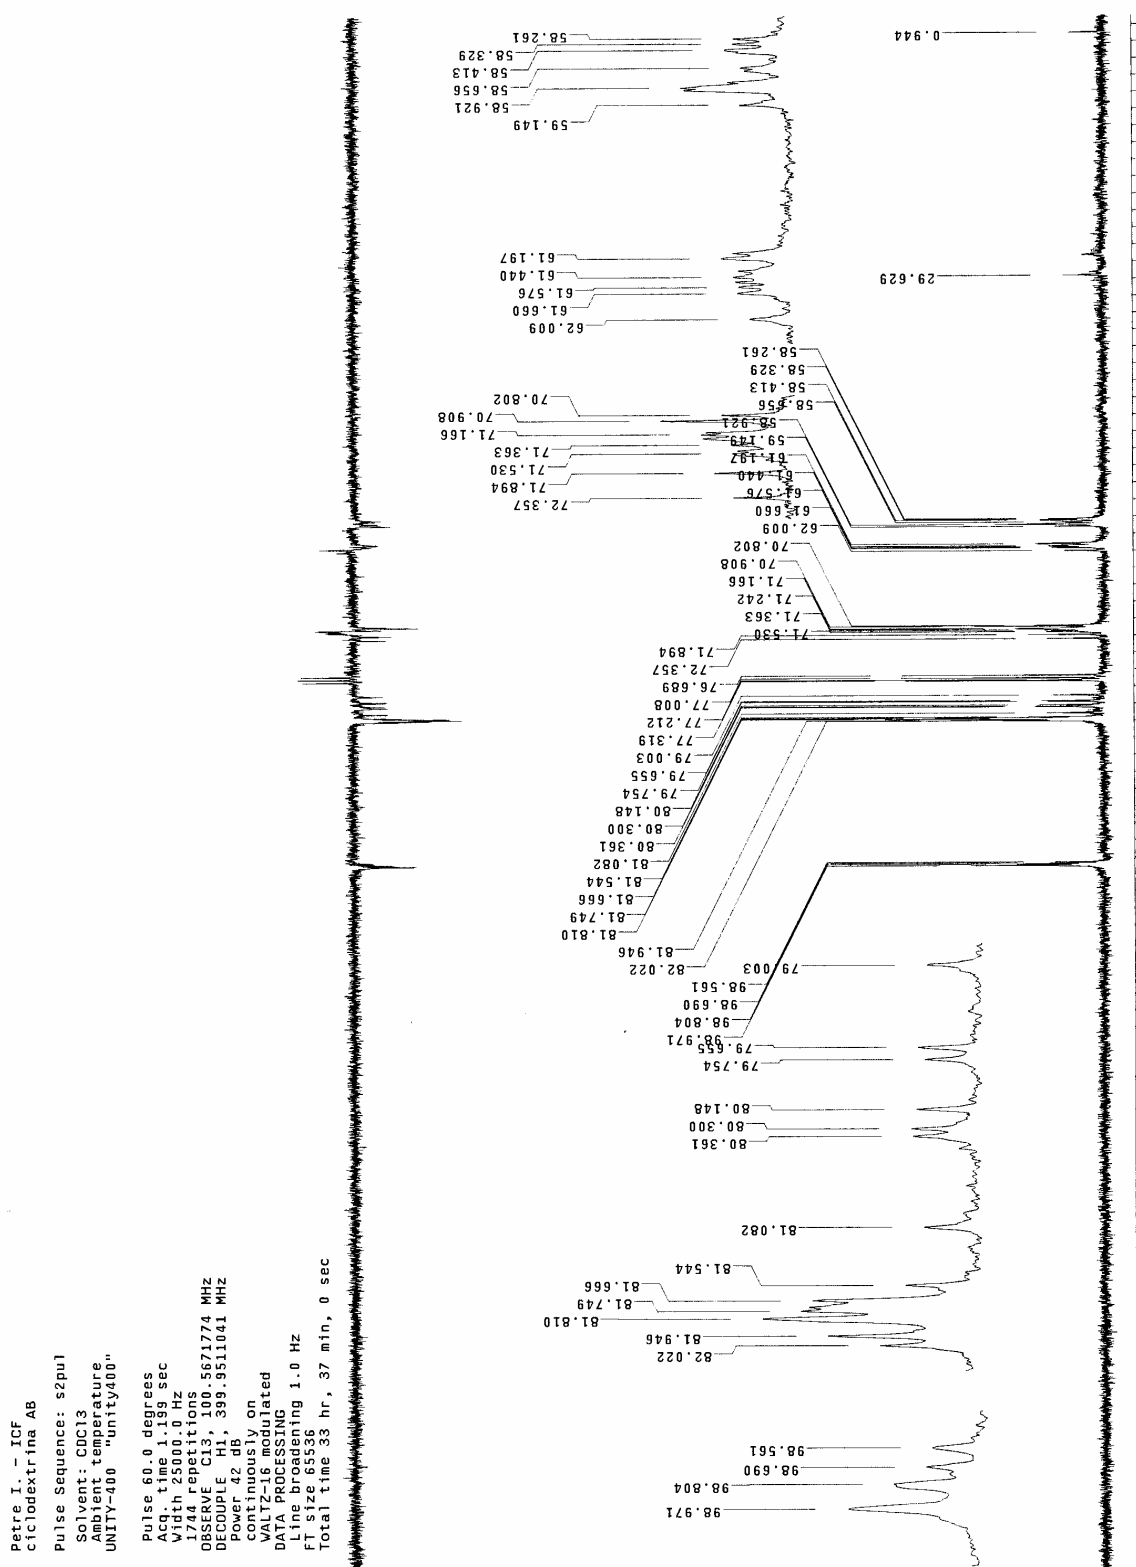

### $^{13}\text{C}$ NMR for dihydroxy permethylated $\beta$ -cyclodextrin (AD isomer)

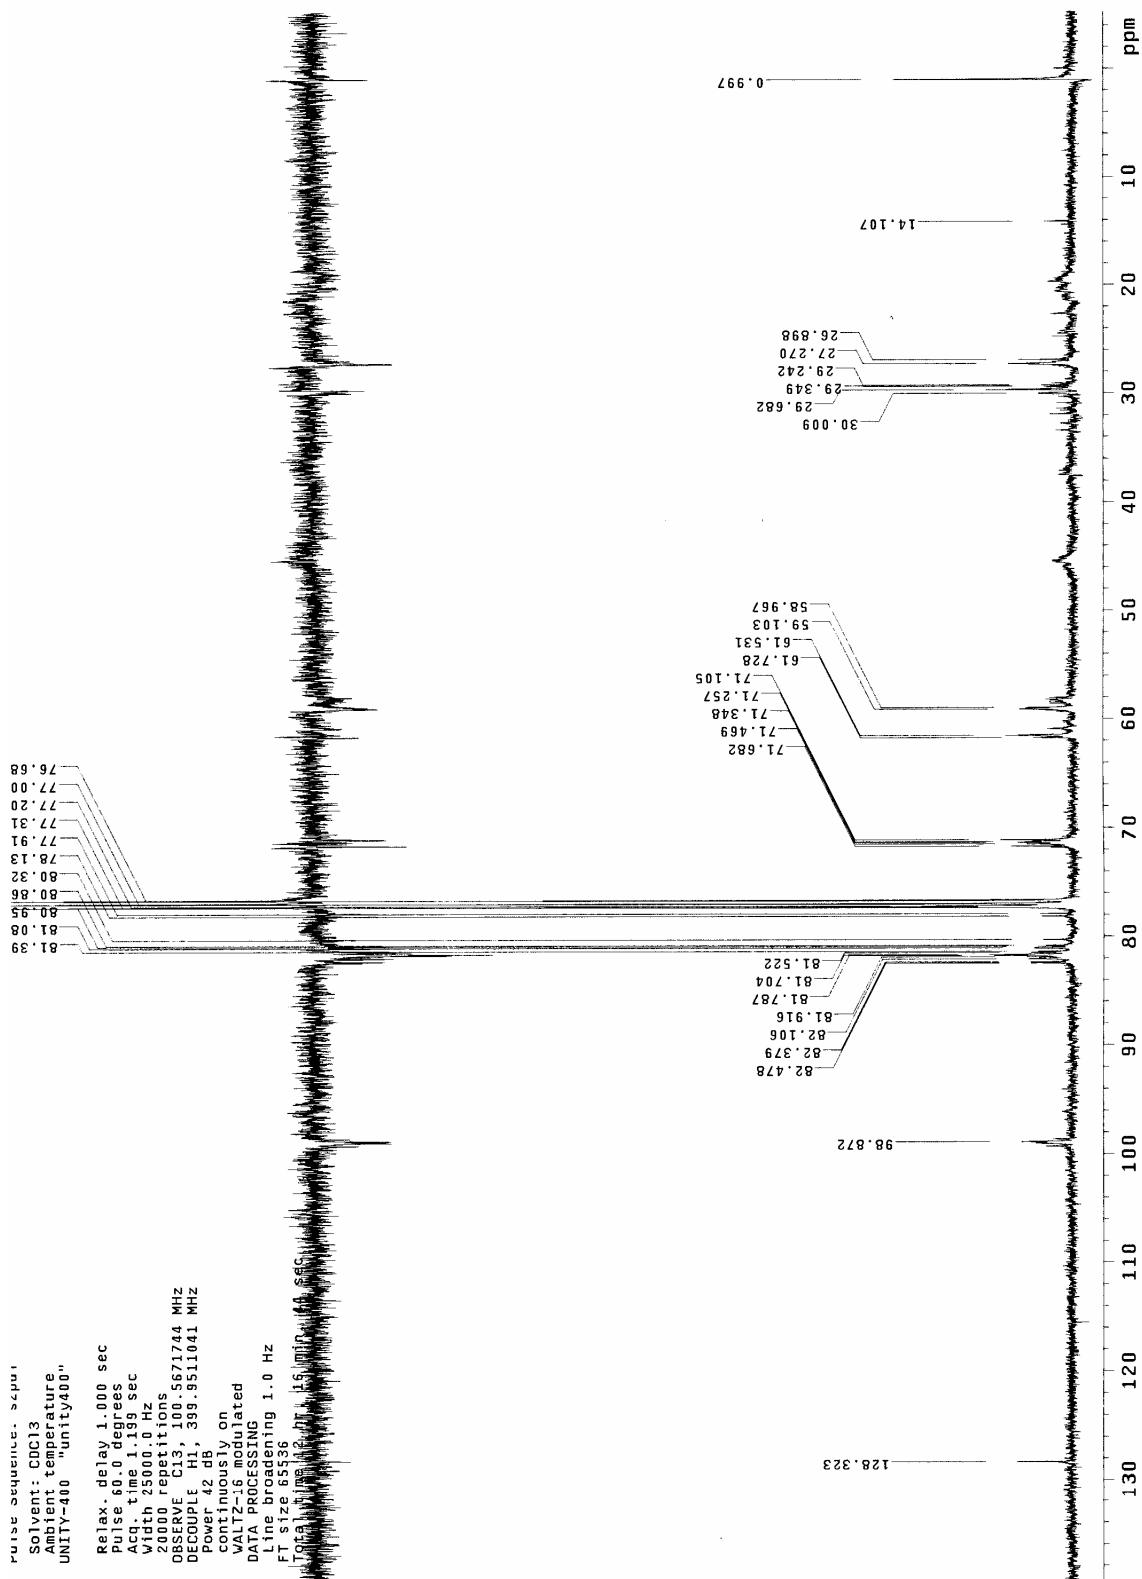





ESI-MS for **AD** diradical.

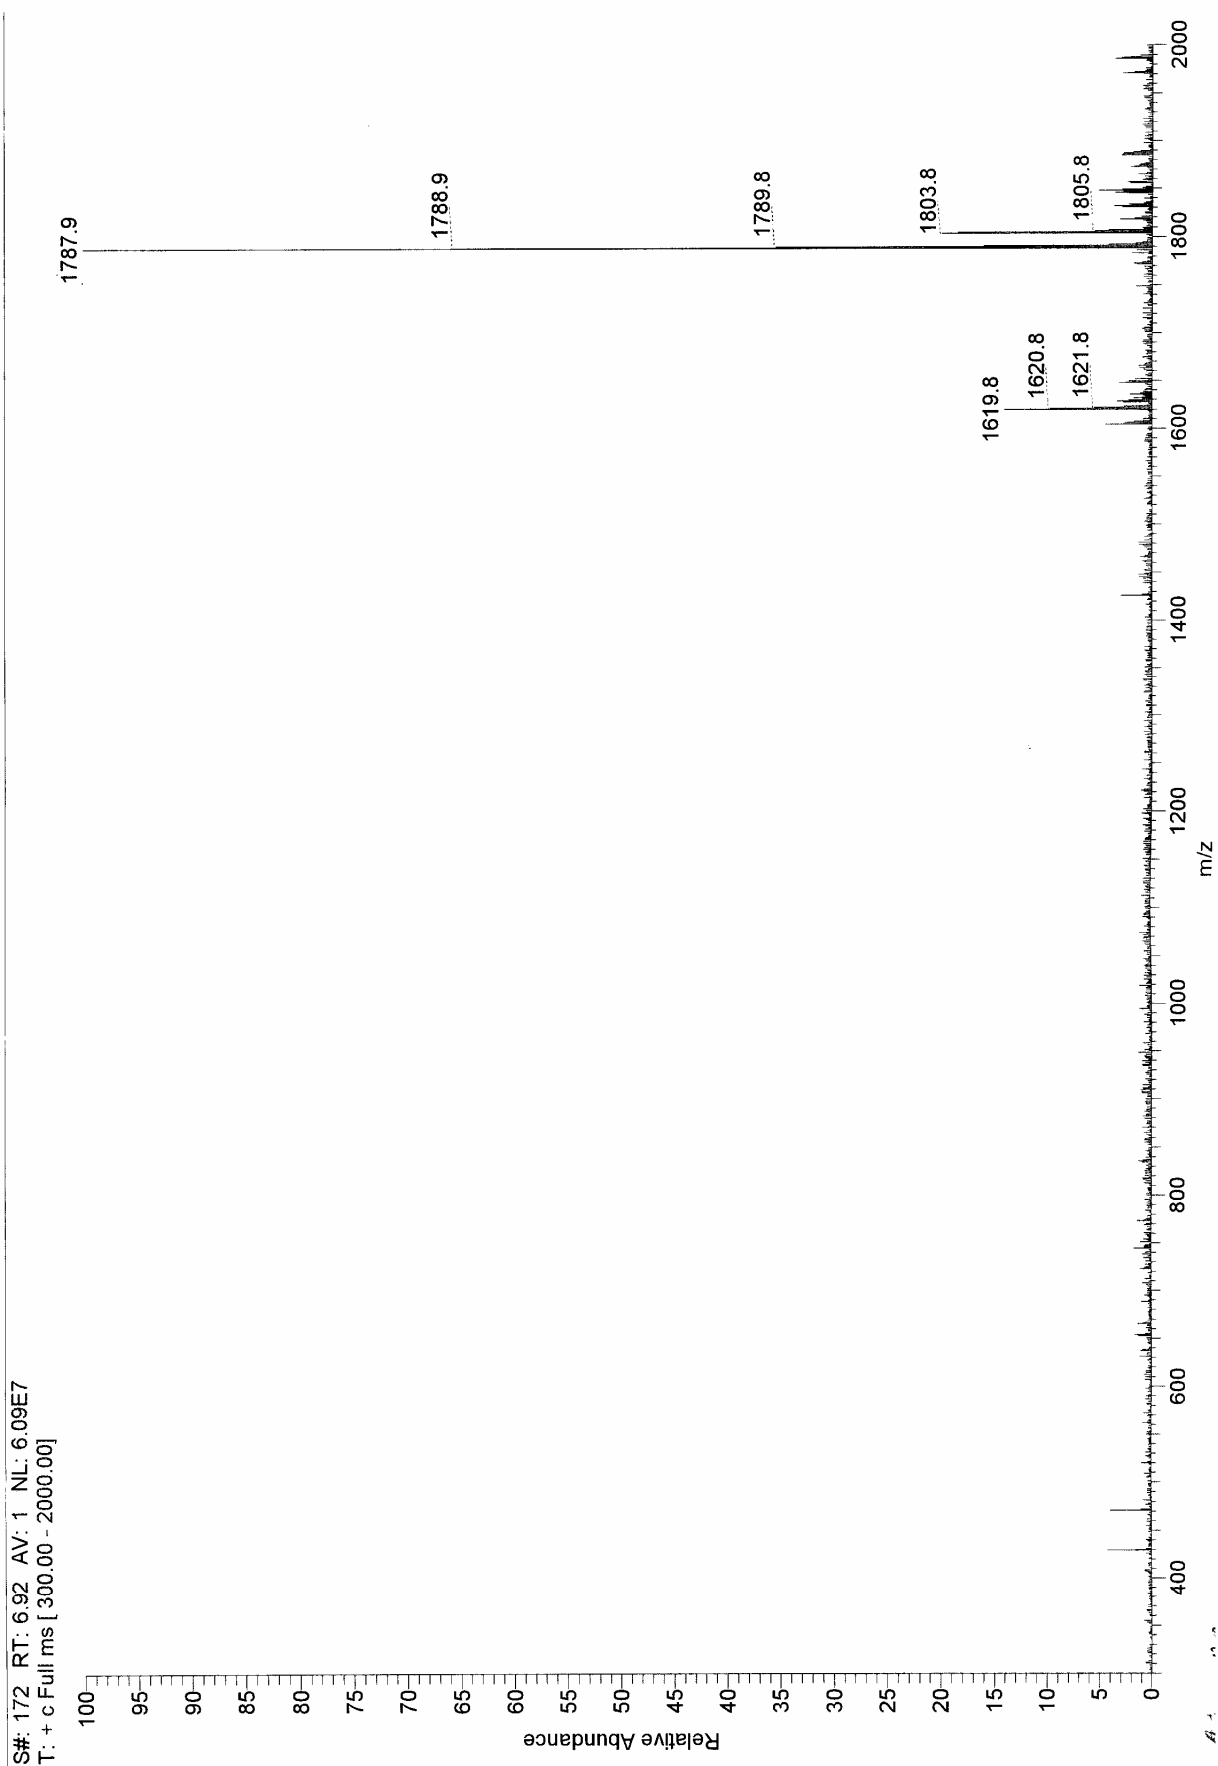

Supplement: b708751a.pdf [file b708751a.pdf]
